# Supplementary material
Source: PubMed Central journal article supplement (PMC4000090)
Supplement: embj0033-0732-sd4.pdf [file embj0033-0732-sd4.pdf]

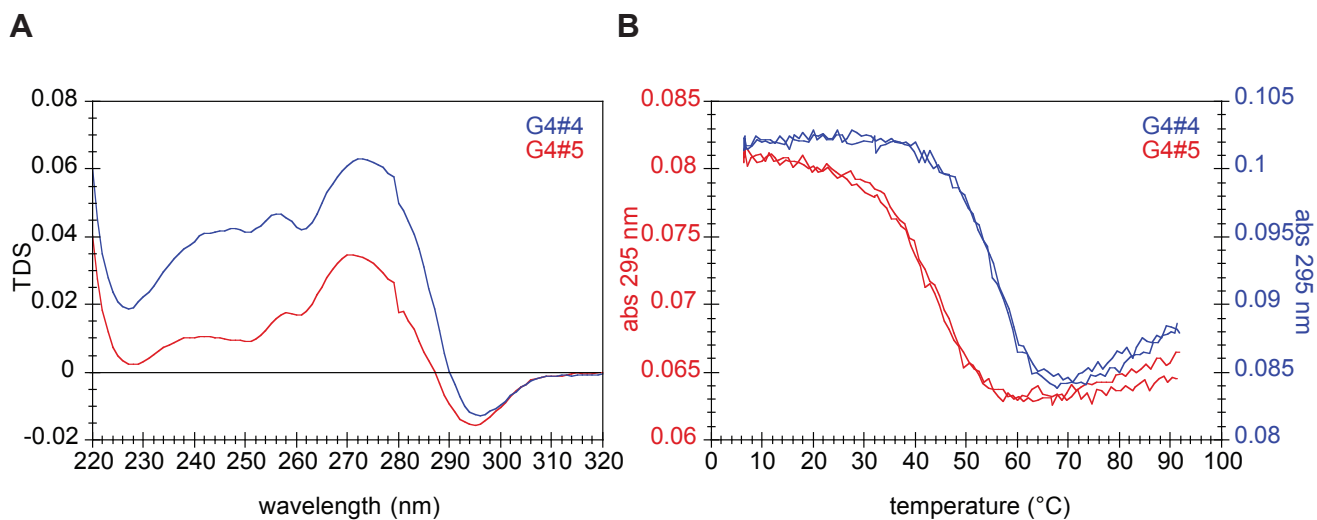

### Supplementary Figure S4 - G4#4 and G4#5 fold into G4

**(A)** Thermal Difference Spectra of G4#4 and G4#5. Their TDS are characteristic of G4 structures. **(B)** Melting profiles recorded by UV-absorption at 295 nm of G4#4 and G4#5. The melting temperatures of G4#4 and G4#5 were 56 and 45°C, respectively. TDS and melting profiles were recorded at 2  $\mu$ M oligonucleotide concentration, in the presence of 10mM KCl.
