# Supplementary material
Source: PubMed Central journal article supplement (PMC4000090)
Supplement: embj0033-0732-sd7.pdf [file embj0033-0732-sd7.pdf]

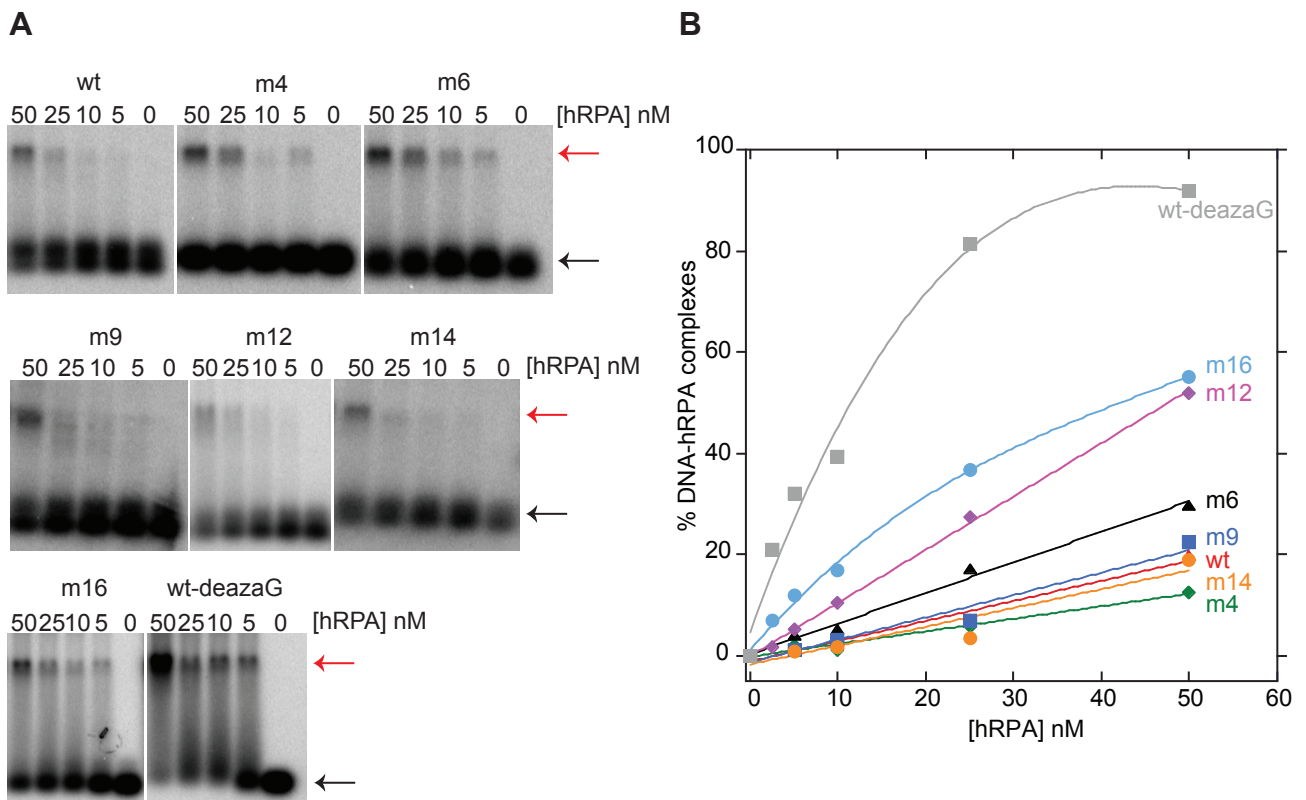

### Supplementary Figure S7 - hRPA binding to G4#1 and its mutants

**(A)** Titration of DNA as a function of hRPA concentration. P32 DNA (2 nM) was incubated with various amounts of hRPA (from 5 to 50 nM) in the presence of 100 mM KCl and separated on a native 1% agarose gel. The red arrows indicate the bound DNA (DNA-hRPA complexes), the black arrows indicate the free DNA. **(B)** DNA-hRPA binding quantification for different amounts of hRPA. The percentage of DNA-hRPA complexes corresponds to the bound DNA/total DNA (free DNA and bound DNA) ratio. wt-deazaG corresponds to the wt sequence in which some guanines were replaced by 7-deaza-guanine (dG1G1GG1GG1G1GCG1G, 1=7-deaza-guanine). We used UV-absorption methods (thermal different spectra and circular dichroism) to check that this modified oligonucleotide did not fold into G4.
