# Supplementary material
Source: PubMed Central journal article supplement (PMC4000090)
Supplement: embj0033-0732-sd11.pdf [file embj0033-0732-sd11.pdf]

**A**

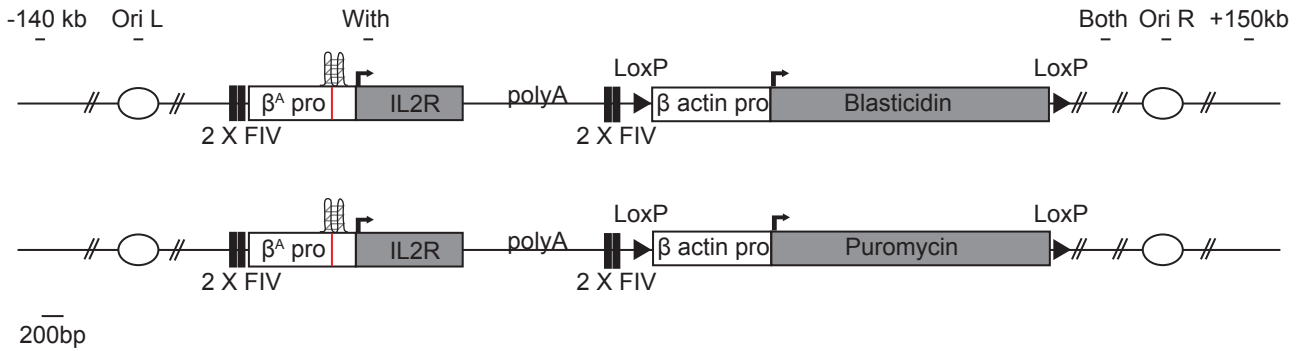

**B**

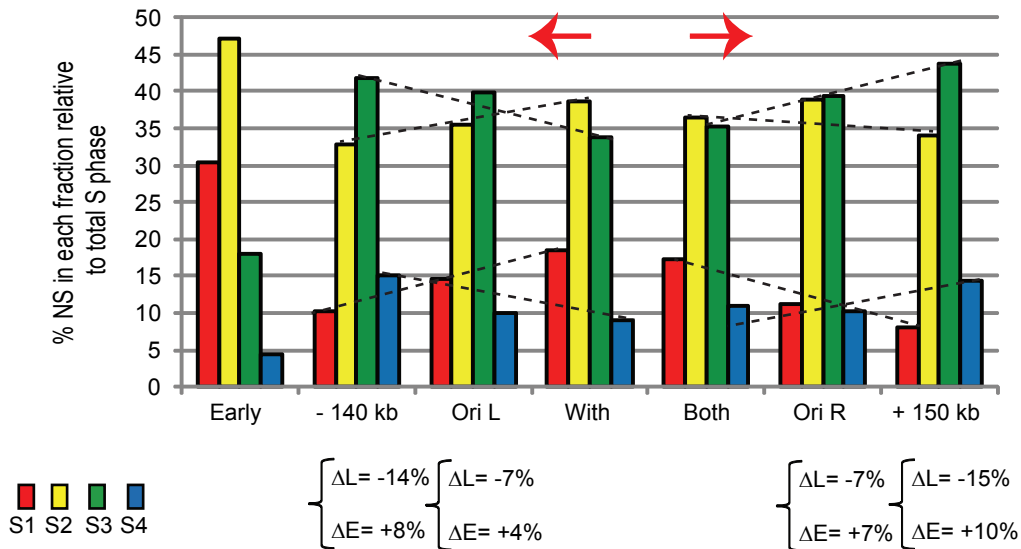

**Supplementary Figure S11 (Adapted from Hassan Zadeh *et al*, 2012) - The replication timing shift affects only the replicon located inside the transgene.**

(A) Schematic representation of the transgenic locus containing the IL2R transgene flanked by two copies of FIV (USF binding sites) linked to the  $\beta$ -actin promoter, blasticidin resistance transgene on one allele and puromycin resistance transgene on the other. Primer pairs used are located at the top of the figure. (B) Analysis of replication timing at the integration site and over a 300 kb region surrounding the transgene integration site in one cell line. The differences in late or early replication ( $\Delta L$  and  $\Delta E$ ) at flanking regions compared with the integration site (With) are shown. Dot lines outline the progressive changes in nascent strand enrichment from the site of insertion (primer pairs With and Both) toward flanking region. The global replication forks' directions deduced are shown by red arrows.
