# Supplementary material
Source: PubMed Central journal article supplement (PMC4000090)
Supplement: embj0033-0732-sd16.pdf [file embj0033-0732-sd16.pdf]

| Point mutations | 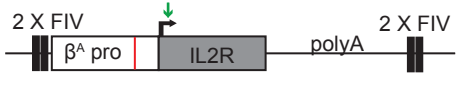 | SNS enrichment at ↓<br>WT 100% |
|-----------------|-----------------------------------------------------------------------------------|--------------------------------|
| m12             | GGGGGGGGGGGAGCGGG                                                                 | 11%                            |
| m16             | GGGGGGGGGGGGGCGAG                                                                 | 25%                            |
| m6              | GGGGGAGGGGGGGCGGG                                                                 | 18%                            |
| m14             | GGGGGGGGGGGGGAGGG                                                                 | 96%                            |
| m4              | GGGAGGGGGGGGGCGGG                                                                 | 57%                            |
| m9              | GGGGGGGGAGGGGCGGG                                                                 | 35%                            |

| Deletions |    | SNS enrichment at ↓ |
|-----------|--------------------------------------------------------------------------------------|---------------------|
| ΔG        |    | 11%                 |
| Δ5' 1     |  | 57%                 |
| Δ5' 1+2   |  | 120%                |
| Δ5'       |  | 62%                 |
| Δ5' 3     |  | 52%                 |
| Δ3'       |  | 13%                 |

| Inversions |  | SNS enrichment at |     |
|------------|--------------------------------------------------------------------------------------|-------------------|-----|
| InvG4      |  | 42%               | 18% |
| InvG4Δ5'   |  | 122%              | 11% |

**Supplementary Figure S16 - Summary of the various mutants and the relative enrichment in SNS, as determined with primer pairs 0, 1 and 2, for the  $\beta^A$  origin**

The green arrows indicate the site of SNS peak detection for constructs with a G4 motif in the 5' to 3' orientation (primer pairs 1 and 2). The purple arrows indicate the site of SNS peak detection for constructs with the inverted G4 motif (primer pair 0).
